# Supplementary material for: Developing cardiometabolic risk classifiers for youth using handgrip strength, anthropometrics, and demographics: a machine learning approach leveraging National Health and Nutrition Examination Survey Data
Source: Research Square preprint supplement (doi:10.21203/rs.3.rs-488747/v1), 2021-05-04
Supplement: Supplementary file 2 [file 74a57ca4d9563e7f26f30891.docx]

**Table 1.** Pearson and Spearman correlations between all variables in the dataset leveraged in the current study following feature engineering

| Variables |  | Gender | Age | Race | NPHH | NPF | NCFYY | NCSSY | AHHI | RFIP | CHGS | CHGSM | CHGSB | Weight | Height | BMI | WC | ASAD |
| --- | --- | --- | --- | --- | --- | --- | --- | --- | --- | --- | --- | --- | --- | --- | --- | --- | --- | --- |
| Gender | Correlation | 1.000 | -0.065 | -0.029 | 0.041 | 0.036 | 0.092 | 0.076 | -0.024 | -0.013 | -.508** | -.359** | -.501** | -.214** | -.500** | 0.015 | -0.006 | -0.020 |
|  | *P* Value |  | 0.243 | 0.602 | 0.466 | 0.522 | 0.101 | 0.176 | 0.667 | 0.810 | <.001 | <.001 | <.001 | <.001 | <.001 | 0.795 | 0.910 | 0.719 |
| Age | Correlation | -0.065 | 1.000 | 0.046 | -0.083 | -0.083 | -0.029 | -.235** | -0.008 | -0.028 | .511** | .191** | .350** | .345** | .444** | .209** | .203** | .205** |
|  | *P* Value | 0.243 |  | 0.409 | 0.139 | 0.138 | 0.607 | <.001 | 0.892 | 0.623 | <.001 | 0.001 | <.001 | <.001 | <.001 | <.001 | <.001 | <.001 |
| Race | Correlation | -0.029 | 0.046 | 1.000 | -.153** | -.146** | -0.080 | -.111* | .139* | .132* | 0.060 | 0.047 | 0.095 | -0.026 | .124* | -0.091 | -.150** | -0.086 |
|  | *P* Value | 0.602 | 0.409 |  | 0.006 | 0.009 | 0.155 | 0.047 | 0.013 | 0.018 | 0.283 | 0.404 | 0.089 | 0.642 | 0.026 | 0.103 | 0.007 | 0.122 |
| NPHH | Correlation | 0.041 | -0.083 | -.153** | 1.000 | .952** | .425** | .638** | -0.034 | -.230** | -0.089 | 0.044 | -0.008 | -.121* | -.121* | -0.100 | -0.084 | -0.062 |
|  | *P* Value | 0.466 | 0.139 | 0.006 |  | <.001 | <.001 | <.001 | 0.545 | <.001 | 0.110 | 0.429 | 0.885 | 0.031 | 0.030 | 0.075 | 0.135 | 0.270 |
| NPF | Correlation | 0.036 | -0.083 | -.146** | .952** | 1.000 | .404** | .620** | -0.043 | -.164** | -0.080 | 0.068 | 0.013 | -.124* | -.114* | -0.108 | -0.086 | -0.065 |
|  | *P* Value | 0.522 | 0.138 | 0.009 | <.001 |  | <.001 | <.001 | 0.439 | 0.003 | 0.155 | 0.223 | 0.814 | 0.026 | 0.042 | 0.053 | 0.125 | 0.246 |
| NCFYY | Correlation | 0.092 | -0.029 | -0.080 | .425** | .404** | 1.000 | 0.054 | -0.004 | -.175** | -0.024 | -0.081 | -0.089 | 0.048 | -0.030 | 0.078 | 0.099 | 0.086 |
|  | *P* Value | 0.101 | 0.607 | 0.155 | <.001 | <.001 |  | 0.339 | 0.937 | 0.002 | 0.669 | 0.149 | 0.112 | 0.393 | 0.591 | 0.162 | 0.078 | 0.126 |
| NCSSY | Correlation | 0.076 | -.235** | -.111* | .638** | .620** | 0.054 | 1.000 | -0.031 | -.123* | -.180** | 0.052 | -0.040 | -.213** | -.215** | -.167** | -.171** | -.135* |
|  | *P* Value | 0.176 | <.001 | 0.047 | <.001 | <.001 | 0.339 |  | 0.583 | 0.027 | 0.001 | 0.349 | 0.479 | <.001 | <.001 | 0.003 | 0.002 | 0.015 |
| AHHI | Correlation | -0.024 | -0.008 | .139* | -0.034 | -0.043 | -0.004 | -0.031 | 1.000 | .758** | 0.011 | 0.024 | 0.076 | -0.028 | .122* | -0.081 | -0.055 | -0.077 |
|  | *P* Value | 0.667 | 0.892 | 0.013 | 0.545 | 0.439 | 0.937 | 0.583 |  | <.001 | 0.846 | 0.670 | 0.172 | 0.614 | 0.029 | 0.146 | 0.328 | 0.170 |
| RFIP | Correlation | -0.013 | -0.028 | .132* | -.230** | -.164** | -.175** | -.123* | .758** | 1.000 | -0.026 | 0.025 | 0.059 | -0.042 | .110* | -0.094 | -0.081 | -0.101 |
|  | *P* Value | 0.810 | 0.623 | 0.018 | <.001 | 0.003 | 0.002 | 0.027 | <.001 |  | 0.647 | 0.654 | 0.289 | 0.455 | 0.050 | 0.092 | 0.149 | 0.072 |
| CHGS | Correlation | -.508** | .511** | 0.060 | -0.089 | -0.080 | -0.024 | -.180** | 0.011 | -0.026 | 1.000 | .448** | .691** | .588** | .744** | .336** | .317** | .332** |
|  | *P* Value | <.001 | <.001 | 0.283 | 0.110 | 0.155 | 0.669 | 0.001 | 0.846 | 0.647 |  | <.001 | <.001 | <.001 | <.001 | <.001 | <.001 | <.001 |
| CHGSM | Correlation | -.359** | .191** | 0.047 | 0.044 | 0.068 | -0.081 | 0.052 | 0.024 | 0.025 | .448** | 1.000 | .900** | -.402** | .139* | -.589** | -.612** | -.571** |
|  | *P* Value | <.001 | 0.001 | 0.404 | 0.429 | 0.223 | 0.149 | 0.349 | 0.670 | 0.654 | <.001 |  | <.001 | <.001 | 0.012 | <.001 | <.001 | <.001 |
| CHGSB | Correlation | -.501** | .350** | 0.095 | -0.008 | 0.013 | -0.089 | -0.040 | 0.076 | 0.059 | .691** | .900** | 1.000 | -0.090 | .513** | -.393** | -.370** | -.349** |
|  | *P* Value | <.001 | <.001 | 0.089 | 0.885 | 0.814 | 0.112 | 0.479 | 0.172 | 0.289 | <.001 | <.001 |  | 0.107 | <.001 | <.001 | <.001 | <.001 |
| Weight | Correlation | -.214** | .345** | -0.026 | -.121* | -.124* | 0.048 | -.213** | -0.028 | -0.042 | .588** | -.402** | -0.090 | 1.000 | .633** | .890** | .885** | .866** |
|  | *P* Value | <.001 | <.001 | 0.642 | 0.031 | 0.026 | 0.393 | <.001 | 0.614 | 0.455 | <.001 | <.001 | 0.107 |  | <.001 | <.001 | <.001 | <.001 |
| Height | Correlation | -.500** | .444** | .124* | -.121* | -.114* | -0.030 | -.215** | .122* | .110* | .744** | .139* | .513** | .633** | 1.000 | .253** | .350** | .329** |
|  | *P* Value | <.001 | <.001 | 0.026 | 0.030 | 0.042 | 0.591 | <.001 | 0.029 | 0.050 | <.001 | 0.012 | <.001 | <.001 |  | <.001 | <.001 | <.001 |
| BMI | Correlation | 0.015 | .209** | -0.091 | -0.100 | -0.108 | 0.078 | -.167** | -0.081 | -0.094 | .336** | -.589** | -.393** | .890** | .253** | 1.000 | .926** | .909** |
|  | *P* Value | 0.795 | <.001 | 0.103 | 0.075 | 0.053 | 0.162 | 0.003 | 0.146 | 0.092 | <.001 | <.001 | <.001 | <.001 | <.001 |  | <.001 | <.001 |
| WC | Correlation | -0.006 | .203** | -.150** | -0.084 | -0.086 | 0.099 | -.171** | -0.055 | -0.081 | .317** | -.612** | -.370** | .885** | .350** | .926** | 1.000 | .927** |
|  | *P* Value | 0.910 | <.001 | 0.007 | 0.135 | 0.125 | 0.078 | 0.002 | 0.328 | 0.149 | <.001 | <.001 | <.001 | <.001 | <.001 | <.001 |  | <.001 |
| ASAD | Correlation | -0.020 | .205** | -0.086 | -0.062 | -0.065 | 0.086 | -.135* | -0.077 | -0.101 | .332** | -.571** | -.349** | .866** | .329** | .909** | .927** | 1.000 |
|  | *P* Value | 0.719 | <.001 | 0.122 | 0.270 | 0.246 | 0.126 | 0.015 | 0.170 | 0.072 | <.001 | <.001 | <.001 | <.001 | <.001 | <.001 | <.001 |  |
| CMBR | Correlation | -.126* | 0.025 | -0.045 | <.001 | -0.024 | 0.092 | -0.051 | -0.006 | -.116* | .129* | -.329** | -.210** | .415** | .110* | .460** | .481** | .491** |
|  | *P* Value | 0.024 | 0.651 | 0.424 | 0.996 | 0.670 | 0.098 | 0.361 | 0.912 | 0.037 | 0.021 | <.001 | <.001 | <.001 | 0.049 | <.001 | <.001 | <.001 |

Abbreviations: Number of People in Household, NPHH; Number of People in Family, NPF; Number of Children Five Years or Younger, NCFYY; Number of Children Six to Seventeen Years, NCSSY; Annual Household Income, AHHI; Ratio of family Income to Poverty, RFIP; Combined Handgrip Strength, CHGS; Combined Handgrip Strength normalized to body mass, CHGSM; Combined Handgrip Strength normalized to BMI, CHGSB; Body Mass Index, BMI; Waist Circumference, WC; Average Sagittal Abdominal Diameter, ASAD; Cardiometabolic Risk, CMBR. .
